# Supplementary material for: Recycling waste aluminium foil to bio-acceptable nano photocatalysts [aluminium oxide (Al2O3) & aluminium oxyhydroxide (AlOOH)]; dye degradation as proof-of-concept
Source: Royal Society of Chemistry journal article supplement (doi:10.1039/d4ma00717d), 2024-01-01
Supplement: d4ma00717d1.pdf [file d4ma00717d1.pdf]

### Supplementary Information

#### Recycling Waste Aluminium Foil to Bio-Acceptable Nano Photocatalyst [Aluminium oxide ( $\text{Al}_2\text{O}_3$ ) & Aluminium oxyhydroxide ( $\text{AlOOH}$ )]; Dye Degradation as Proof-of-Concept

Bunty Sharma<sup>a,§</sup>, Arshdeep Sahi<sup>b,§</sup>, Jaspreet Dhau<sup>a</sup>, Ajeet Kaushik<sup>c</sup>, Rajeev Kumar<sup>b,\*</sup> and Ganga Ram Chaudhary<sup>d,e\*</sup>

<sup>a</sup> Research and Development, Molekule Inc., Lakeland, Florida, USA

<sup>b</sup> Department of Environment Studies, Panjab University, Chandigarh, 160014 India

<sup>c</sup> NanoBioTech Laboratory, Department of Environmental Engineering, Florida Polytechnic University, Lakeland, FL, USA

<sup>d</sup> Department of Chemistry and Center for Advance Study in Chemistry, Chandigarh, India

<sup>e</sup> Sophisticated Analytical Instrumentation Laboratory (SAIF)/Central Instrumentation Laboratory (CIL), Panjab University, Chandigarh, 160014, India

§ Both have contributed equally.

\* Corresponding authors: (Rajeev Kumar and Ganga Ram Chaudhary)

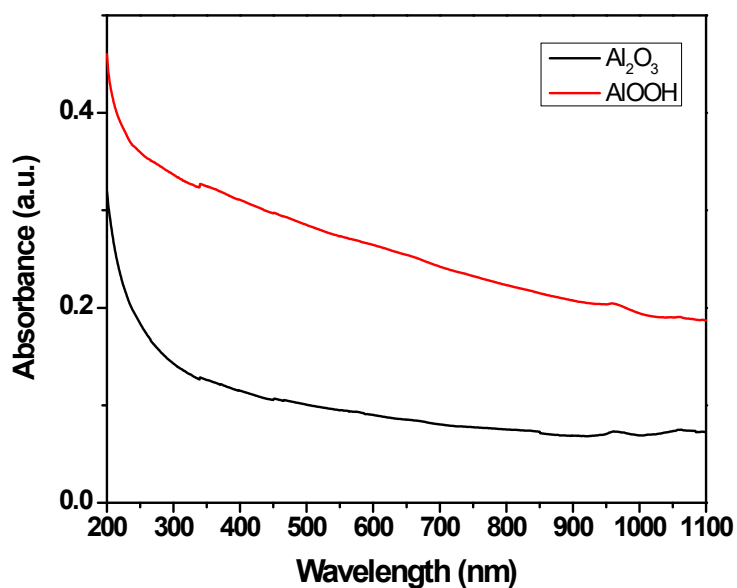

**Figure S1:** UV-Visible Absorption spectra of both,  $\text{Al}_2\text{O}_3$  (Black) and  $\text{AlOOH}$  (Red)

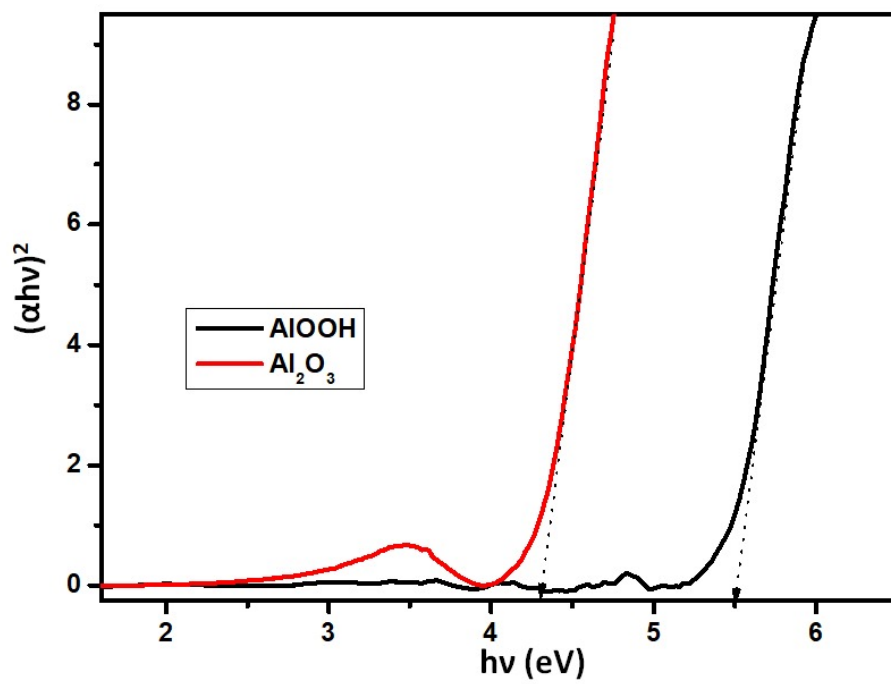

**Figure S2:** Tauc plot of  $\text{Al}_2\text{O}_3$  (Red) and  $\text{AlOOH}$  (Black)

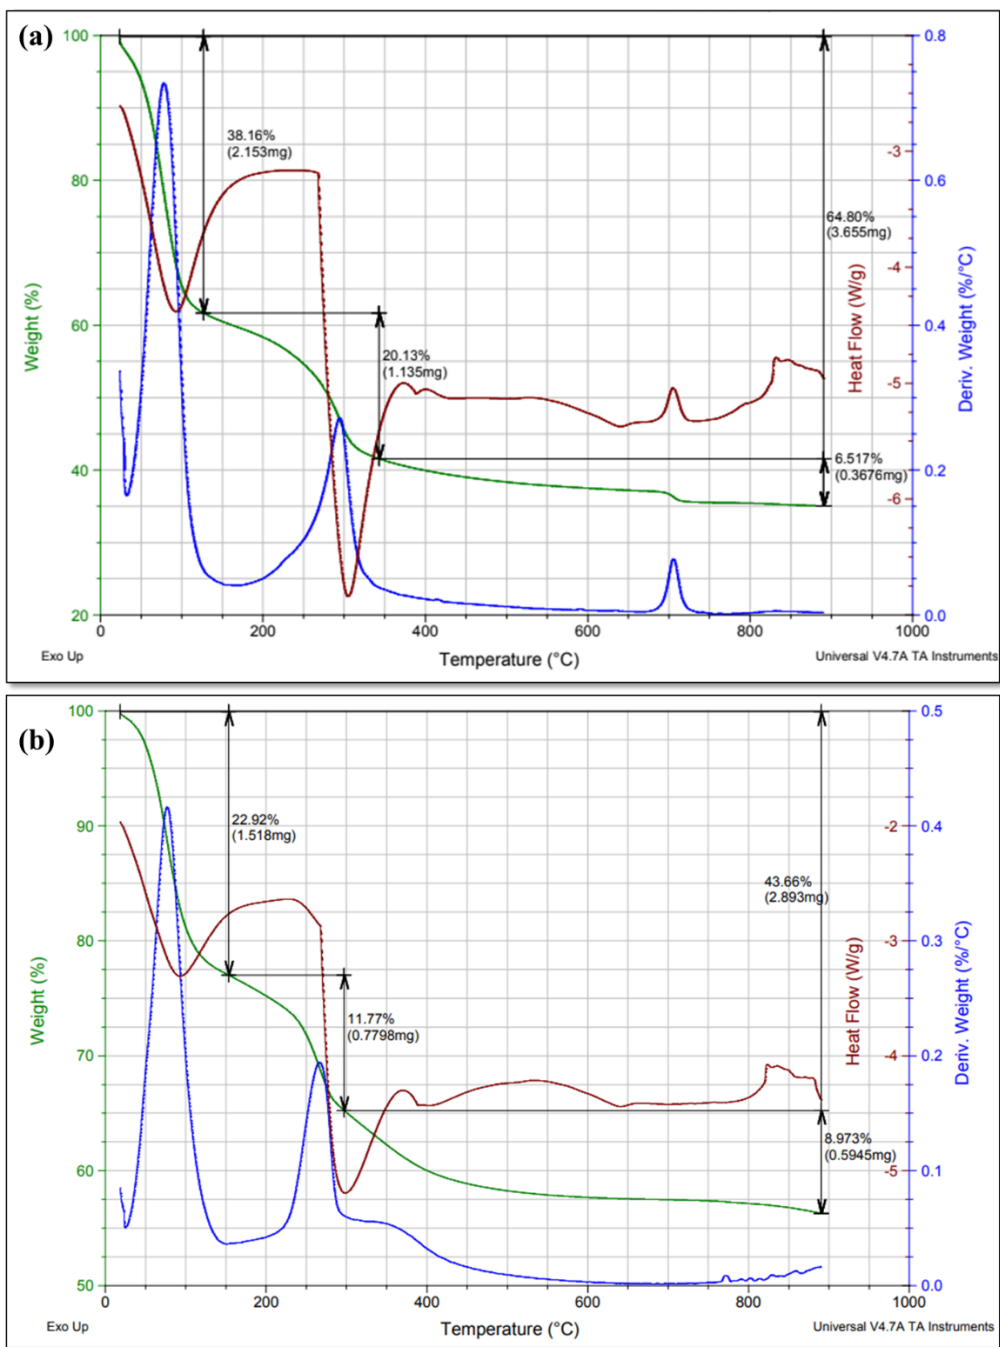

Figure S3: TGA-DSC graph (a) Al<sub>2</sub>O<sub>3</sub> and (b) AlOOH.

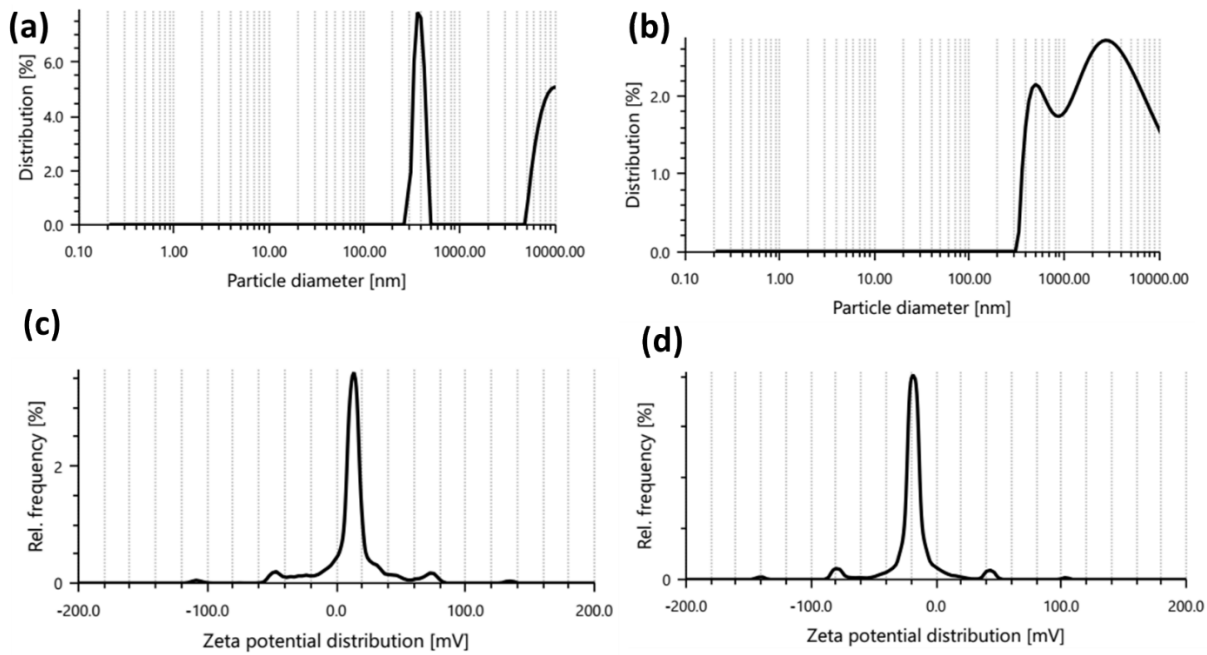

**Figure S4.** At pH 5, DLS graph (a) Al<sub>2</sub>O<sub>3</sub>, (b) AlOOH, Zeta-potential graphs (c) Al<sub>2</sub>O<sub>3</sub>, (d) AlOOH

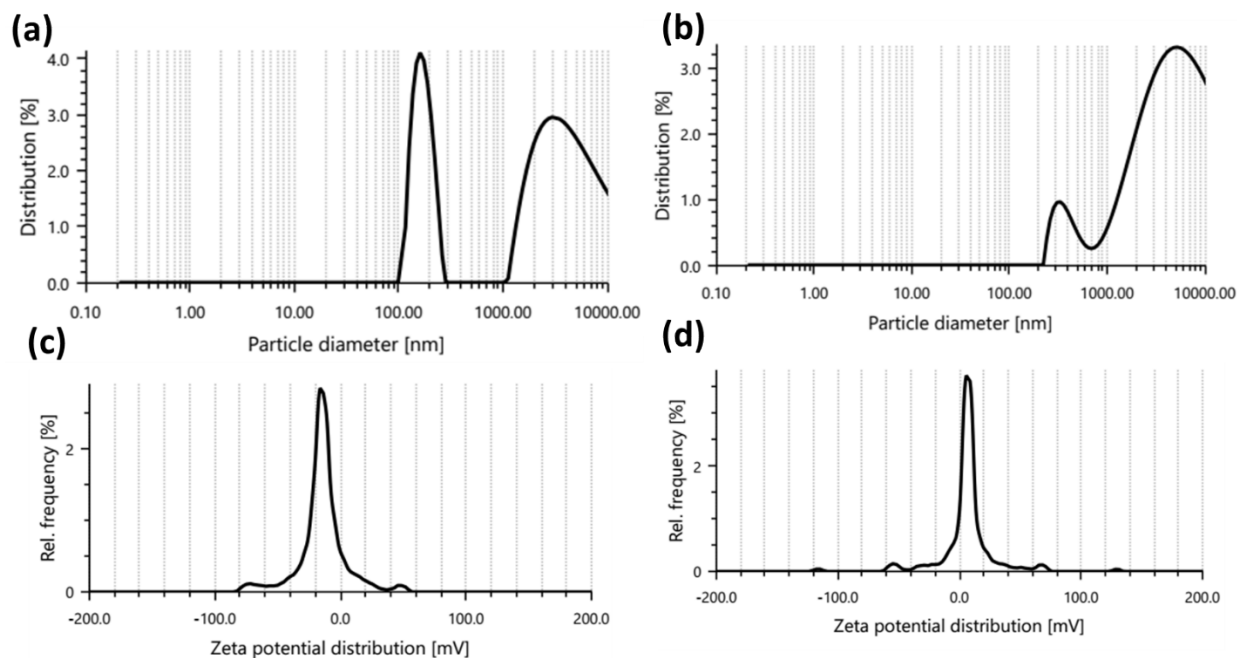

**Figure S5.** At pH 7, DLS graph (a) Al<sub>2</sub>O<sub>3</sub>, (b) AlOOH, Zeta-potential graphs (c) Al<sub>2</sub>O<sub>3</sub>, (d) AlOOH

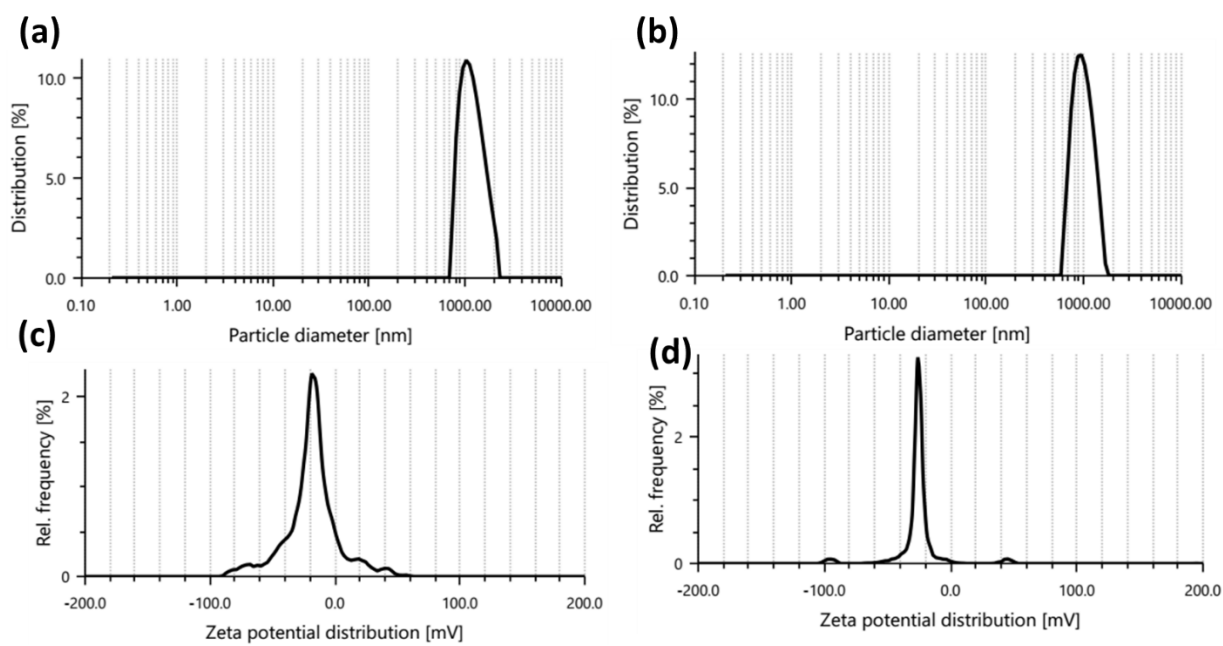

**Figure S6.** At pH 9, DLS graph **(a)**  $\text{Al}_2\text{O}_3$ , **(b)**  $\text{AlOOH}$ , Zeta-potential graphs **(c)**  $\text{Al}_2\text{O}_3$ , **(d)**  $\text{AlOOH}$

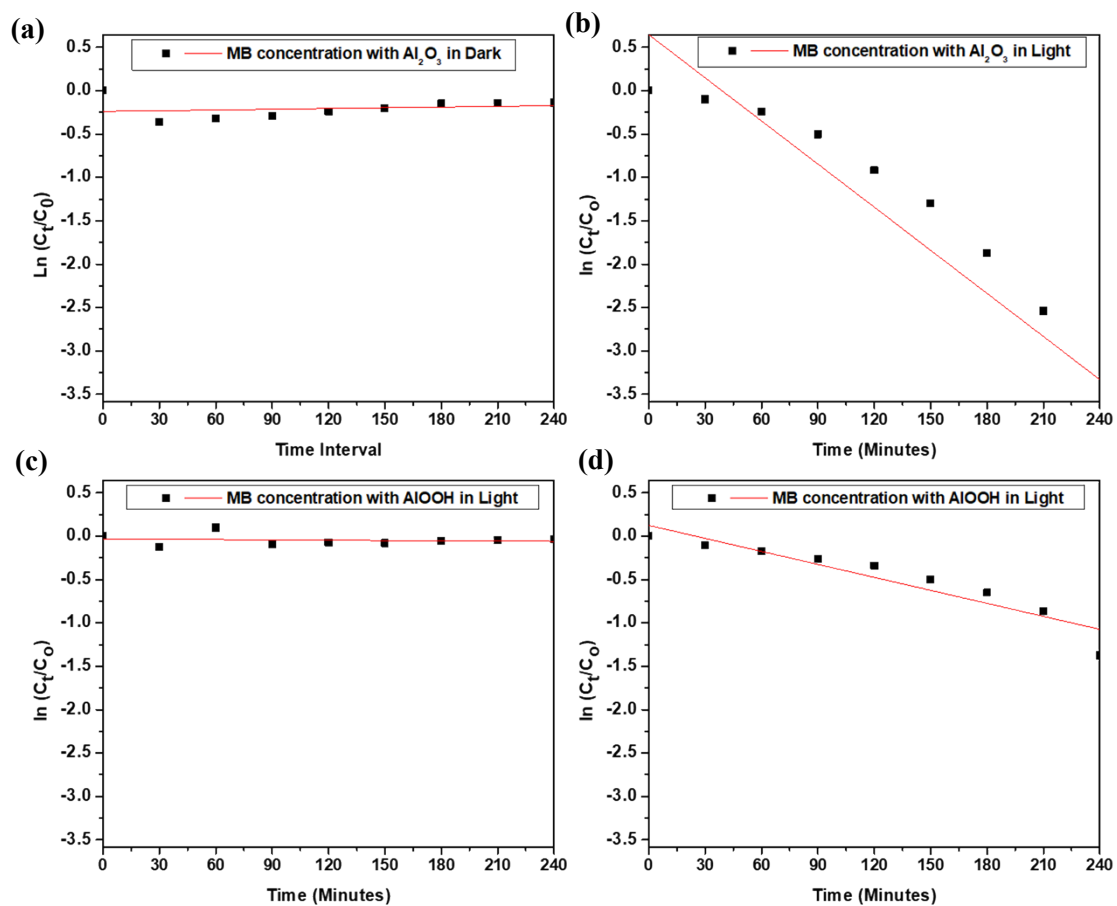

**Figure S7:** The graphs  $\ln(C_t/C_0)$  vs time of  $Al_2O_3$  in the Dark and Light (a and b), and AlOOH in the Dark and Light (c and d). These graphs are for pH 7.

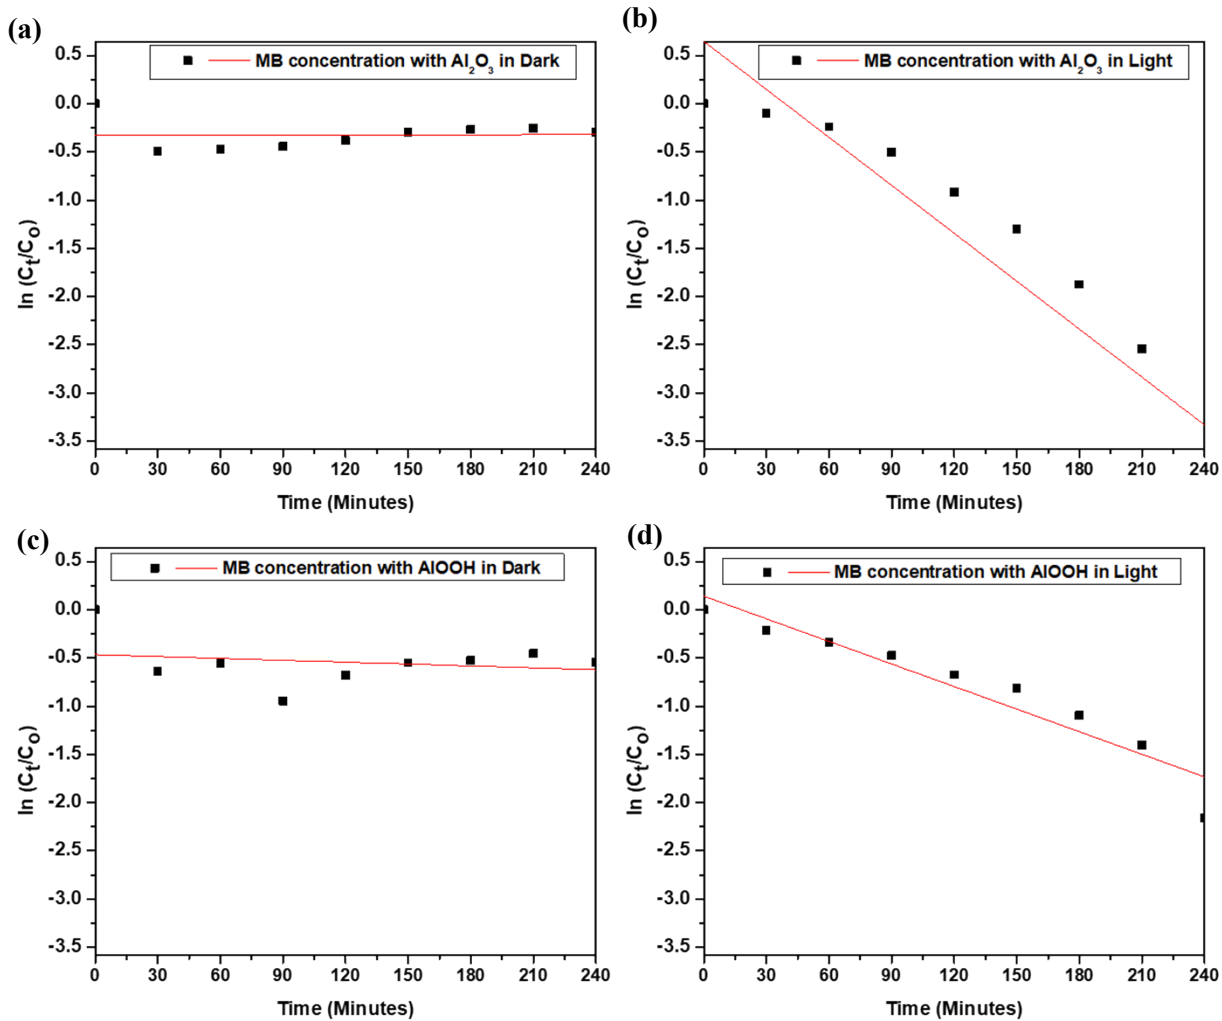

**Figure S8:** The graphs  $\ln(C_t/C_0)$  vs time of  $Al_2O_3$  in the Dark and Light (a and b), and  $AlOOH$  in the Dark and Light (c and d). These graphs are for pH 9.

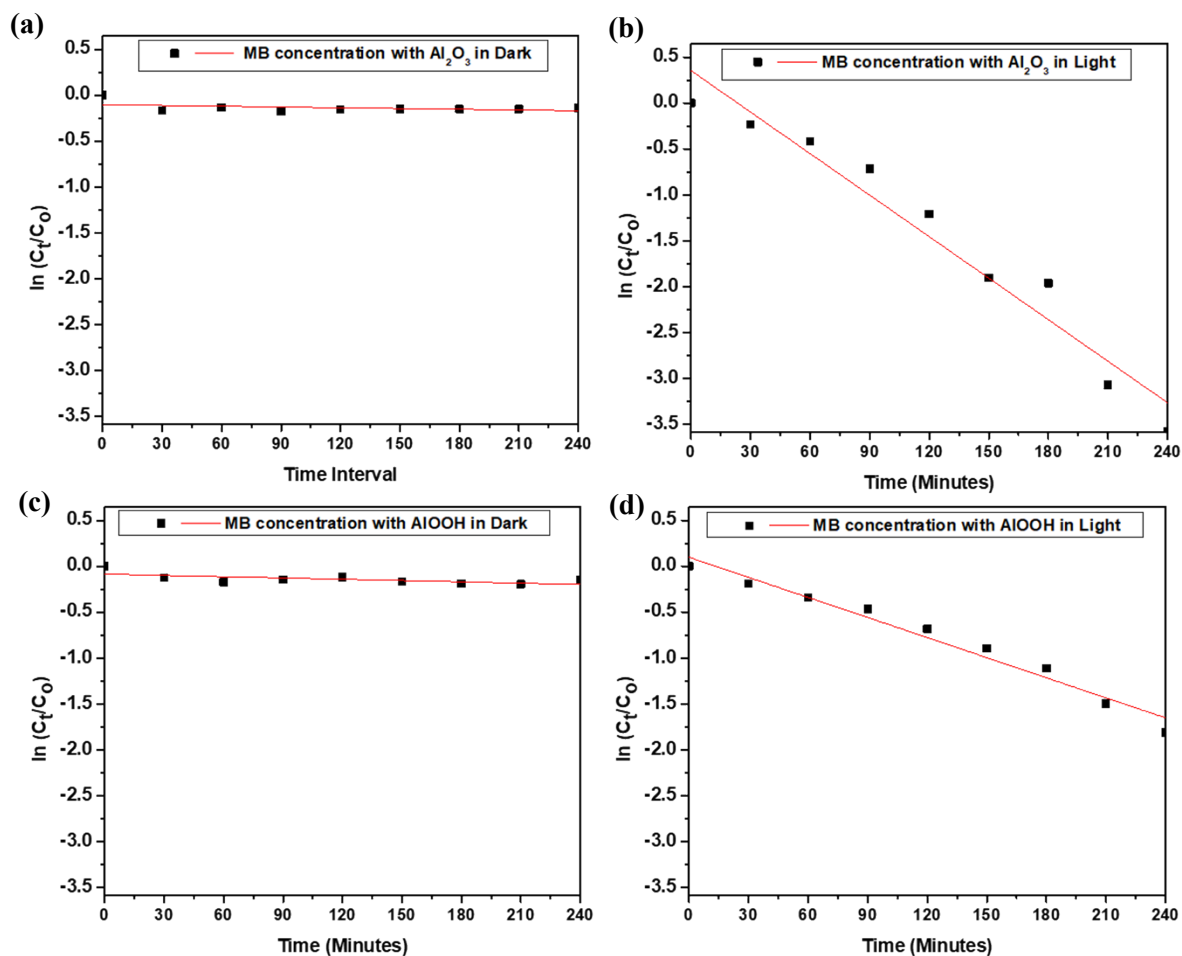

**Figure S9:** The graphs  $\ln(C_t/C_0)$  vs time of  $Al_2O_3$  in the Dark and Light (a and b), and  $AlOOH$  in the Dark and Light (c and d). These graphs are for pH 5.

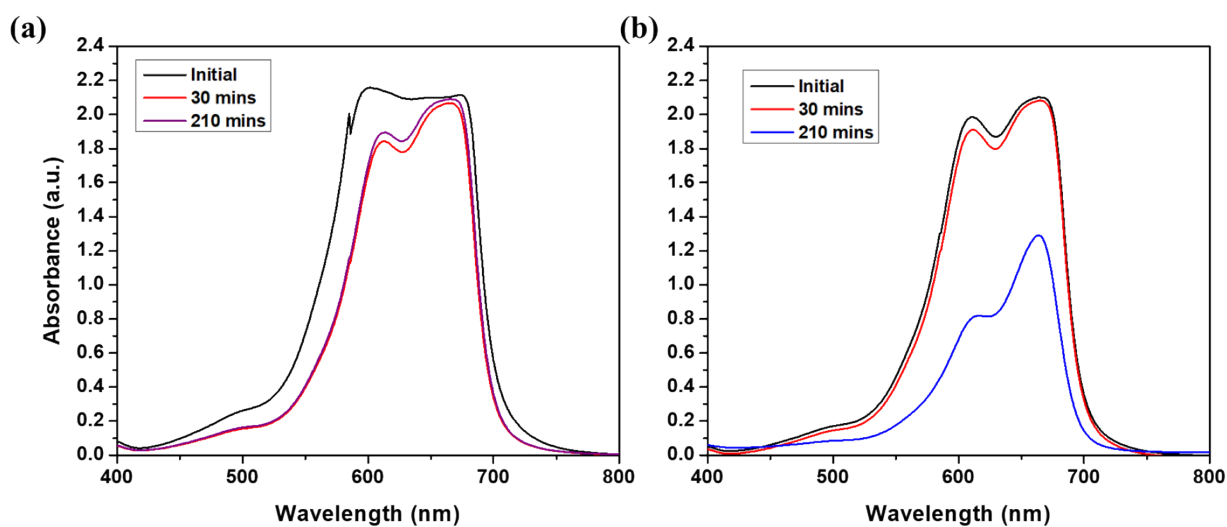

**Figure S10:** The graphs methylene blue with  $Al_2O_3$  in (a) dark and (b) presence of visible light after 210 min
